# Supplementary material for: A multi-responsive MOF-based fluorescent probe for detecting Fe3+, Cr2O72− and acetylacetone
Source: Royal Society of Chemistry journal article supplement (doi:10.1039/d1nj04628d), 2021-01-01
Supplement: d1nj04628d1.pdf [file d1nj04628d1.pdf]

## ***Electronic Supplementary Information (ESI)***

### **A multi-responsive MOF-based fluorescent probe for detecting Fe<sup>3+</sup>, Cr<sub>2</sub>O<sub>7</sub><sup>2-</sup> and acetylacetone**

**Jing Li,<sup>‡</sup> Lin-Hui Wu,<sup>‡</sup> Shu-Li Yao, Hui Xu,\* Teng-Fei Zheng, Sui-Jun Liu,\* Jing-Lin Chen and He-Rui Wen**

School of Chemistry and Chemical Engineering, Jiangxi University of Science and Technology, Ganzhou 341000, Jiangxi Province, P.R. China.

---

\*Corresponding authors. E-mail: sjliu@jxust.edu.cn (S.-J. Liu), xuhuijlu@163.com (H. Xu). Tel: +86-797-8312204.

<sup>‡</sup>These authors contributed equally to this work and should be considered co-first authors.

**Table S1.** Selected bond lengths (Å) and angles (°) for **JXUST-7<sup>a</sup>**.

|                          |            |                                        |            |
|--------------------------|------------|----------------------------------------|------------|
| Zn1—O2                   | 1.949(2)   | Zn1—N5                                 | 2.052(3)   |
| Zn1—O5 <sup>#1</sup>     | 2.010(3)   | Zn1—N1 <sup>#2</sup>                   | 2.074(3)   |
| Zn1—O4 <sup>#1</sup>     | 2.495(3)   |                                        |            |
| O2—Zn1—O5 <sup>#1</sup>  | 107.63(11) | O2—Zn1—N1 <sup>#2</sup>                | 96.23(11)  |
| O2—Zn1—N5                | 105.55(11) | O5 <sup>#1</sup> —Zn1—N1 <sup>#2</sup> | 107.99(11) |
| O5 <sup>#1</sup> —Zn1—N5 | 135.42(12) | N5—Zn1—N1 <sup>#2</sup>                | 96.99(11)  |

<sup>a</sup>Symmetry codes: #1:  $x-1, y, z-1$ ; #2:  $x+1, y, z$ .

**Table S2.** SHAPE analysis of the Zn<sup>II</sup> ions in **JXUST-7**.

| Ions       | Label   | Shape                          | Symmetry | Distortion( $\tau$ ) |
|------------|---------|--------------------------------|----------|----------------------|
| <b>Zn1</b> | PP-5    | Pentagon                       | $D_{5h}$ | 26.371               |
|            | vOC-5   | Vacant octahedron              | $C_{4v}$ | 4.324                |
|            | TBPY-5  | Trigonal bipyramid             | $D_{3h}$ | 6.753                |
|            | SPY-5   | Spherical square pyramid       | $C_{4v}$ | <b>3.461</b>         |
|            | JTBPY-5 | Johnson trigonal bipyramid J12 | $D_{3h}$ | 7.625                |

**Table S3.** HOMO and LUMO energies for the

tested small organic molecules.

|                                 | HOMO      | LUMO      |
|---------------------------------|-----------|-----------|
| MeOH                            | -0.217269 | -0.005182 |
| EG                              | -0.225601 | -0.019567 |
| NPA                             | -0.21424  | 0.003898  |
| IPA                             | -0.215095 | 0.001167  |
| CHA                             | -0.17819  | 0.032718  |
| TMEDA                           | -0.170949 | 0.043141  |
| Et <sub>3</sub> N               | -0.175415 | 0.049403  |
| TMA                             | -0.174871 | 0.040364  |
| THF                             | -0.199818 | 0.048569  |
| CH <sub>3</sub> CN              | -0.246269 | -0.092173 |
| CYH                             | -0.221497 | 0.025644  |
| Acetone                         | -0.19347  | -0.113941 |
| CH <sub>2</sub> Cl <sub>2</sub> | -0.259379 | -0.032987 |
| CHCl <sub>3</sub>               | -0.263968 | -0.062737 |
| CCl <sub>4</sub>                | -0.273404 | -0.088098 |
| acac                            | -0.209983 | -0.144376 |

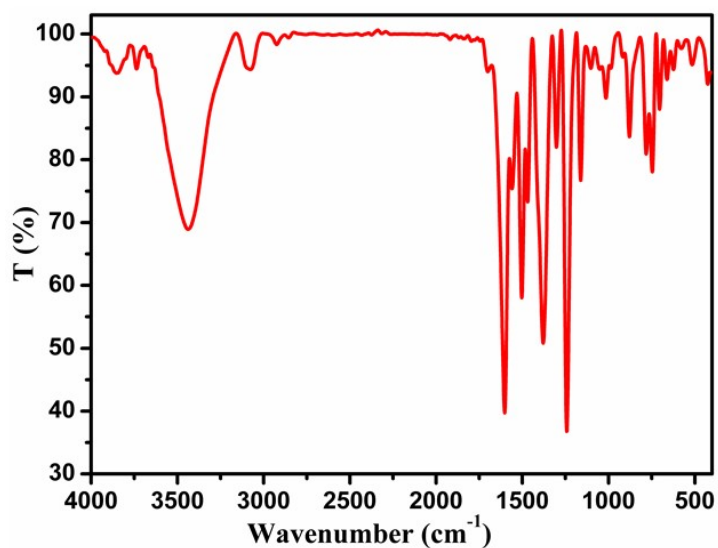

Fig. S1. IR spectrum of JXUST-7 at room temperature.

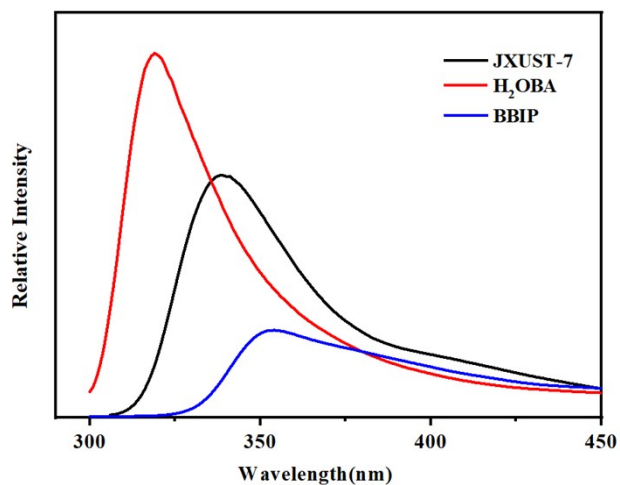

**Fig. S2.** Solid-state emission spectra of JXUST-7, H<sub>2</sub>OBA and BBIP.

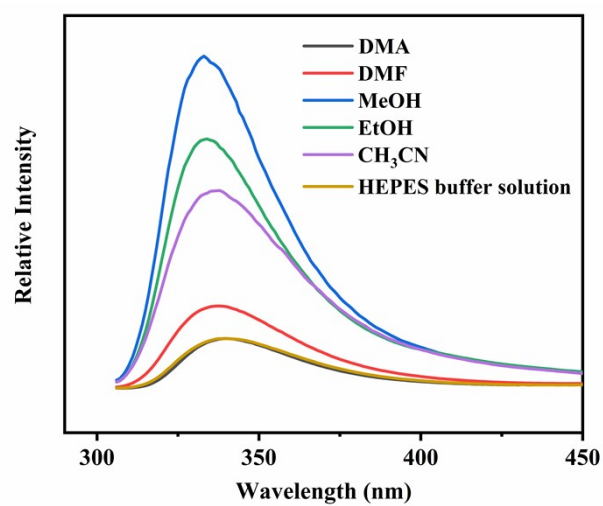

**Fig. S3.** The emission spectra of JXUST-7 in some common solvents and HEPES buffer solution.

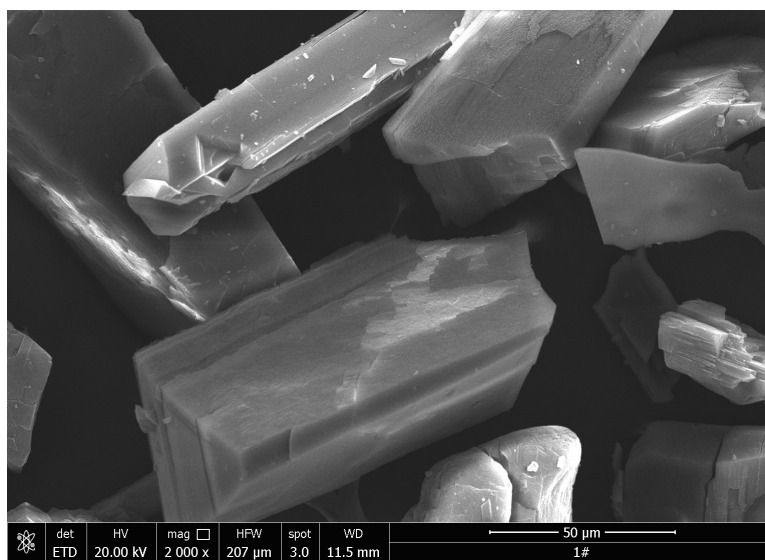

**Fig. S4.** SEM image of JXUST-7.

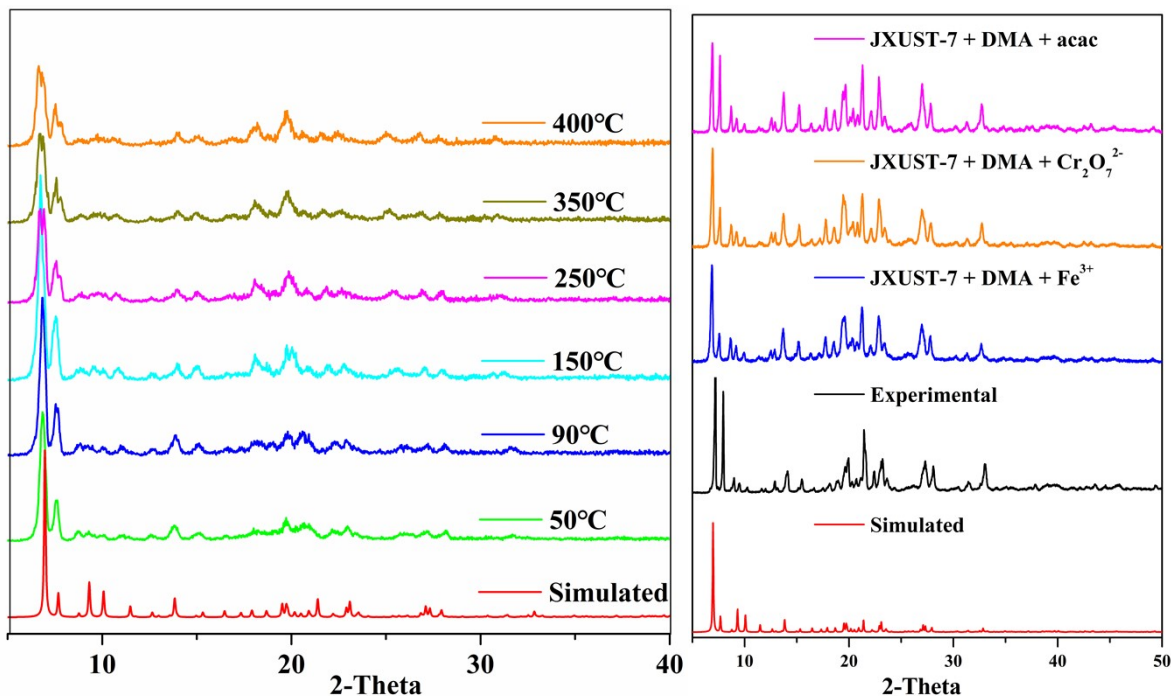

(a)

(b)

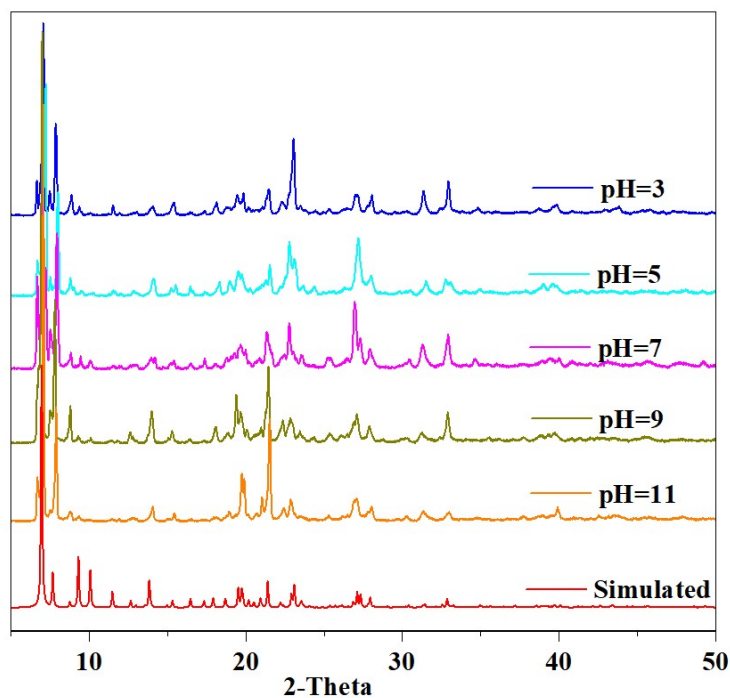

(c)

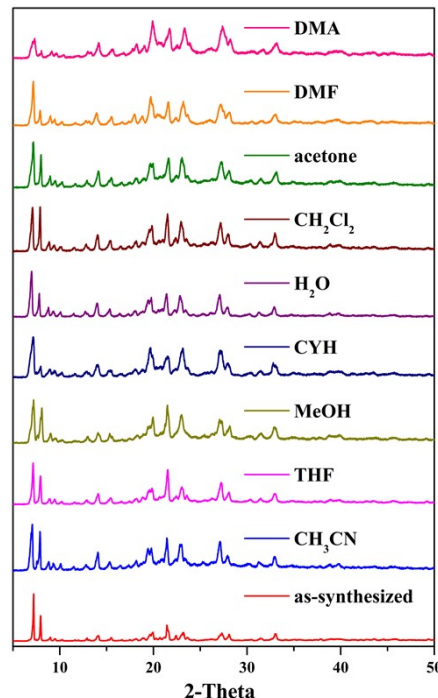

(d)

**Fig. S5.** (a) The simulated and experimental PXRD patterns of **JXUST-7** at different temperatures; (b) The simulated and experimental PXRD patterns of **JXUST-7** and **JXUST-7** after immersing in DMA solutions containing Fe<sup>3+</sup>, Cr<sub>2</sub>O<sub>7</sub><sup>2-</sup> and acac for 24 h; (c) The simulated and experimental PXRD patterns of **JXUST-7** in aqueous solution with diverse pH. (d) The as-synthesized and experimental PXRD patterns of **JXUST-7** after immersing in common organic solvents for 24 h.

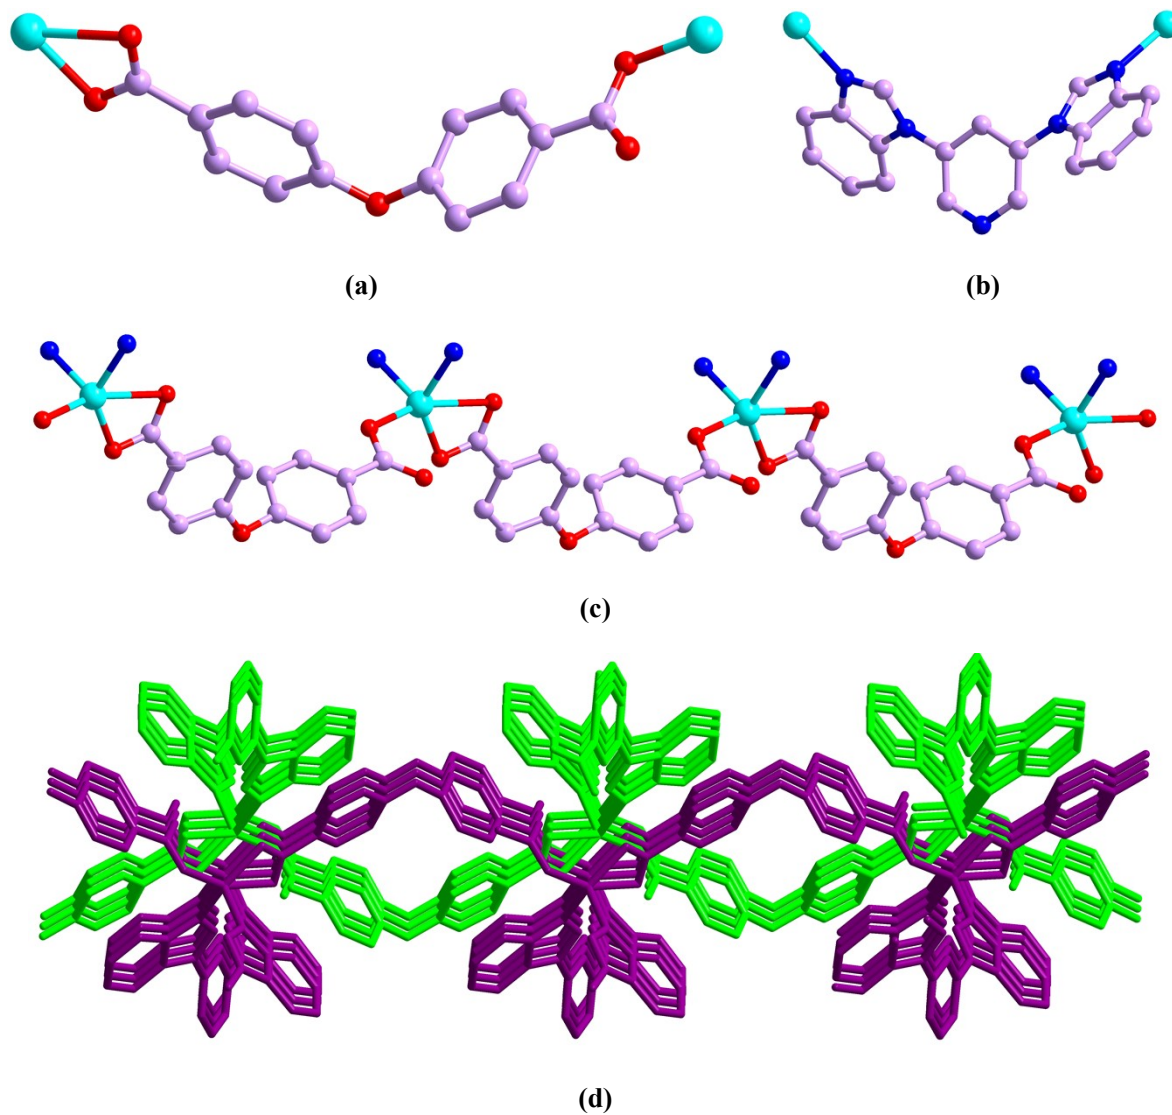

**Fig. S6.** View of (a) the coordination modes of OBA<sup>2-</sup> in **JXUST-7**; (b) The coordination mode of BBIP in **JXUST-7**; (c) The 1D Zn<sup>II</sup>-OBA<sup>2-</sup> chain in **JXUST-7** and (d) The opposite parallel 2D layers of **JXUST-7**.

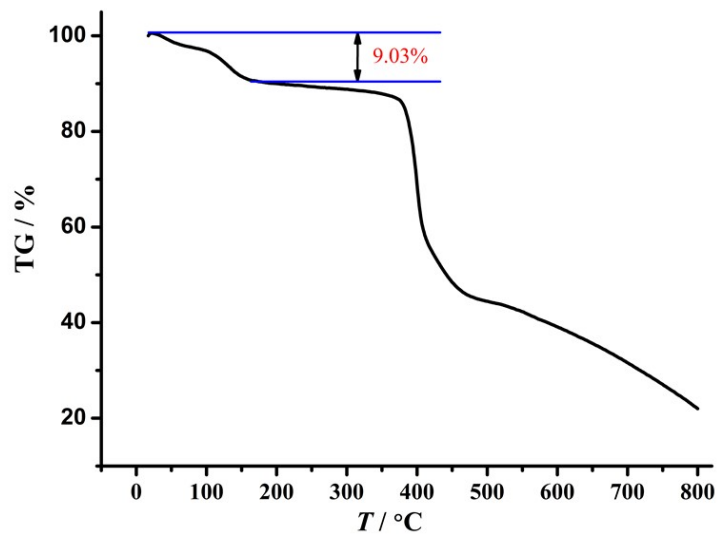

**Fig. S7.** The TGA curve for JXUST-7.

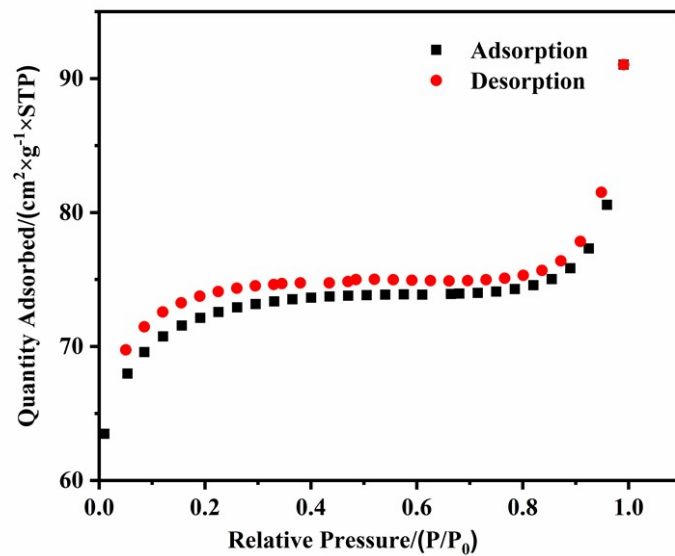

**Fig. S8.** The N<sub>2</sub> sorption isotherms of JXUST-7 at 77.15 K.

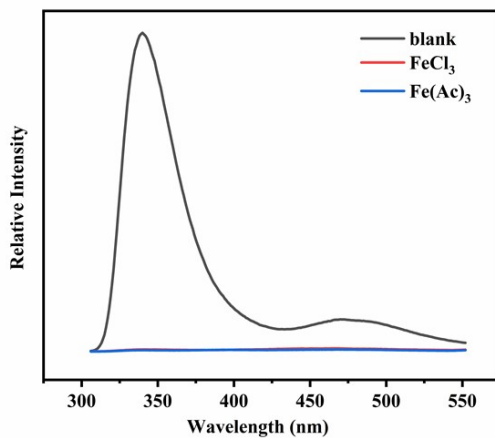

**Fig. S9.** The competitive experiments of JXUST-7 in sensing  $\text{Fe}^{3+}$  with the interference of other anion (halide, acetate)-containing  $\text{Fe}^{3+}$  salts in DMA solutions.

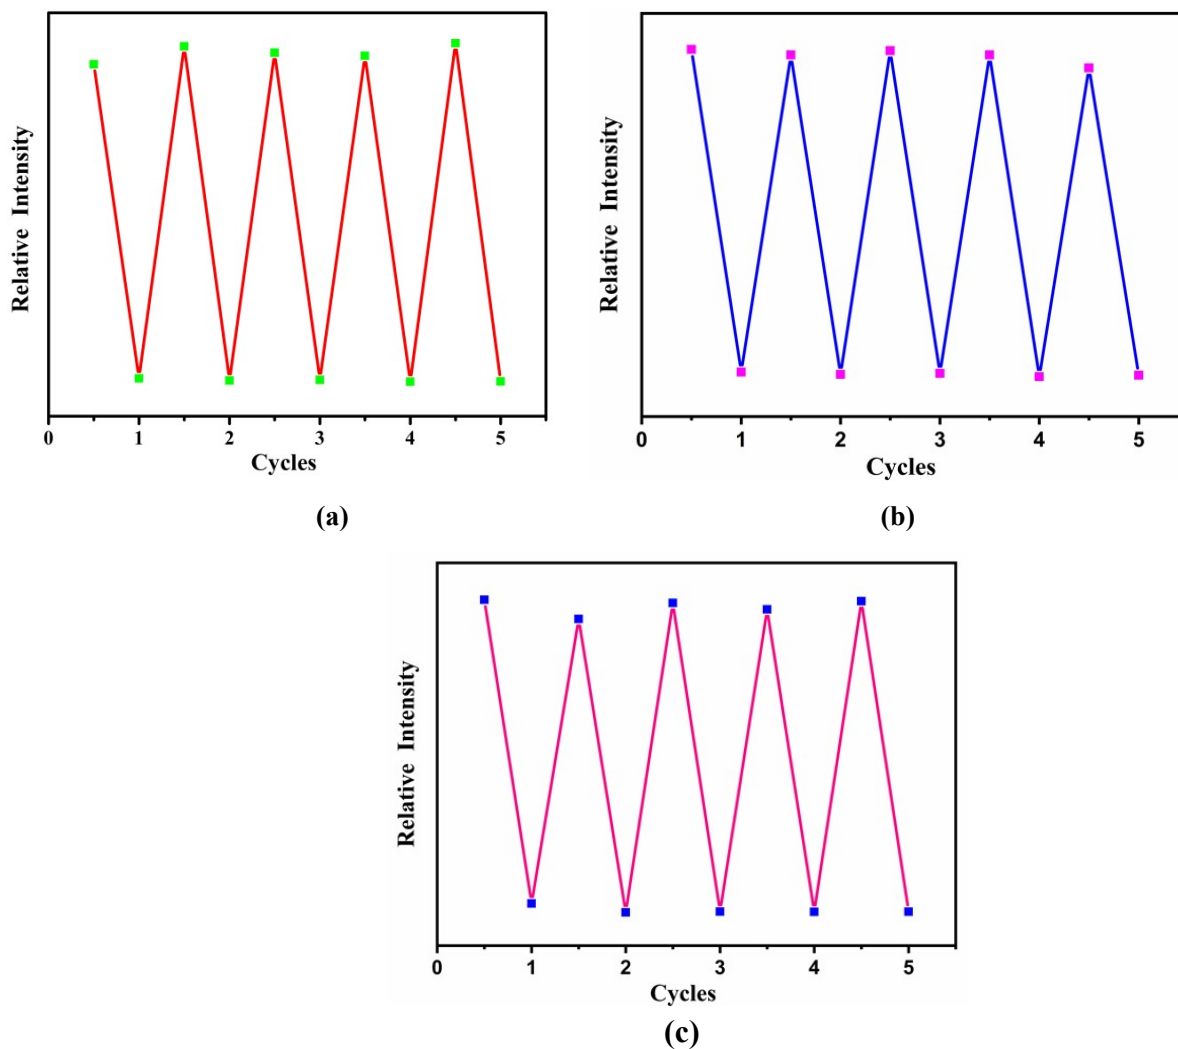

**Fig. S10.** Relative luminescent intensity of JXUST-7 after five runs of recycling experiments for (a)  $\text{Fe}^{3+}$ , (b)  $\text{Cr}_2\text{O}_7^{2-}$  and (c) acac.



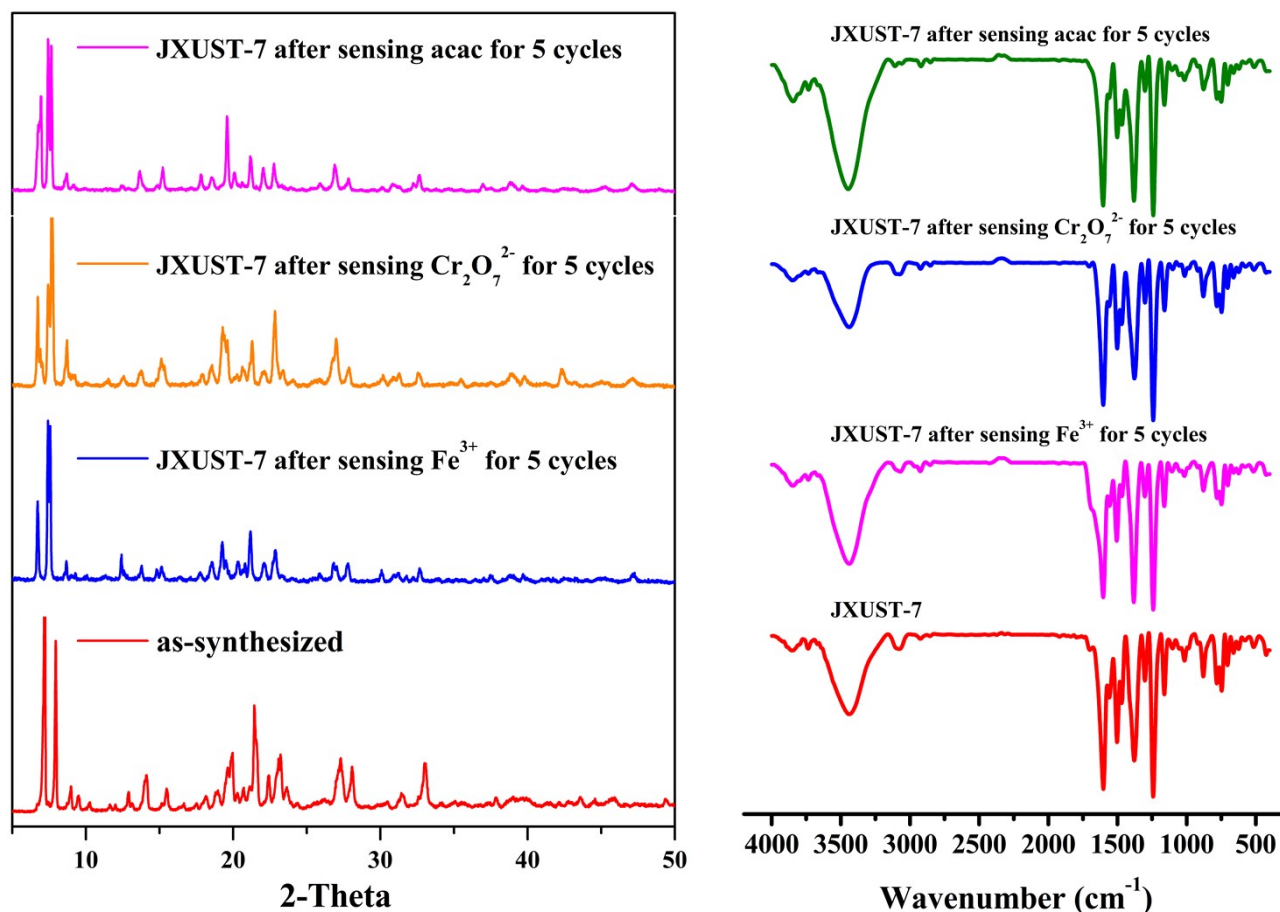

**Fig. S11.** (a) The as-synthesized and experimental PXRD patterns of JXUST-7 after sensing  $\text{Fe}^{3+}$ ,  $\text{Cr}_2\text{O}_7^{2-}$  and acac for 5 cycles; (b) IR spectra of JXUST-7 and JXUST-7 after sensing  $\text{Fe}^{3+}$ ,  $\text{Cr}_2\text{O}_7^{2-}$  and acac for 5 cycles, respectively.

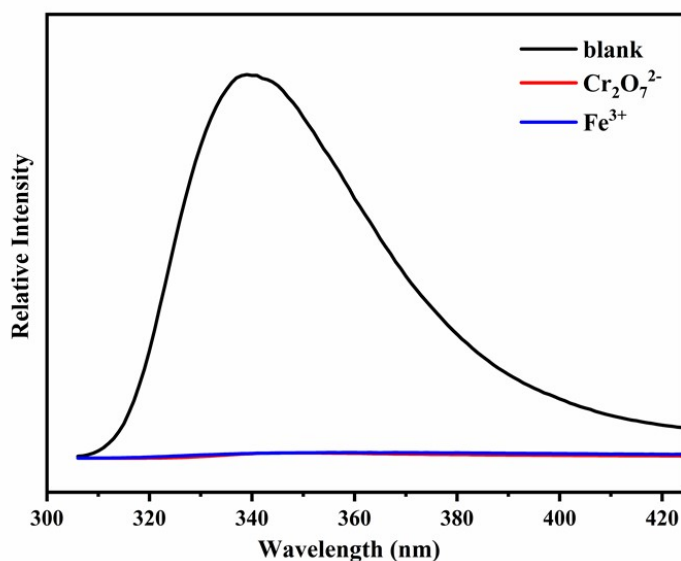

**Fig. S12** Emission spectra of JXUST-7 dispersed in HEPES buffer (pH = 7.4) with the addition of  $\text{Fe}^{3+}$  and  $\text{Cr}_2\text{O}_7^{2-}$ .

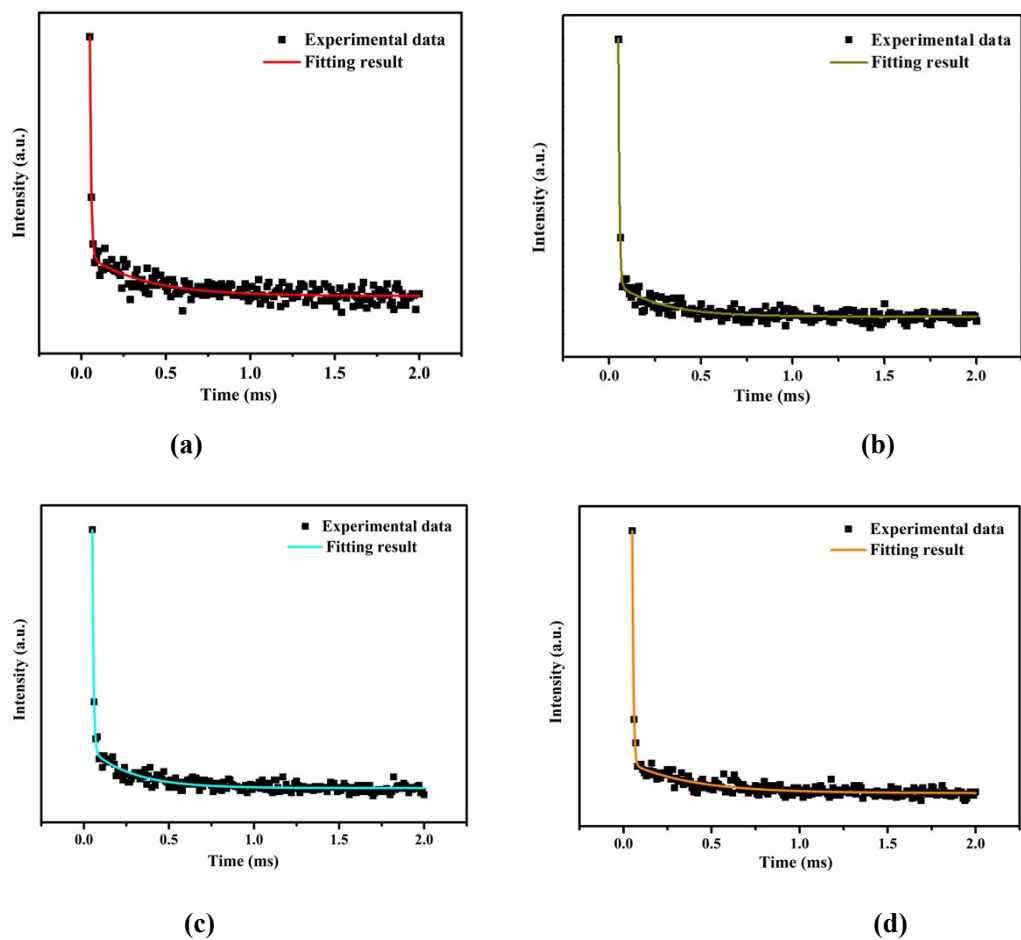

**Fig. S13.** Time-resolved decay of (a) JXUST-7, (b) JXUST-7@ Fe<sup>3+</sup>, (c) JXUST-7@ Cr<sub>2</sub>O<sub>7</sub><sup>2-</sup> and (d) JXUST-7@ acac.

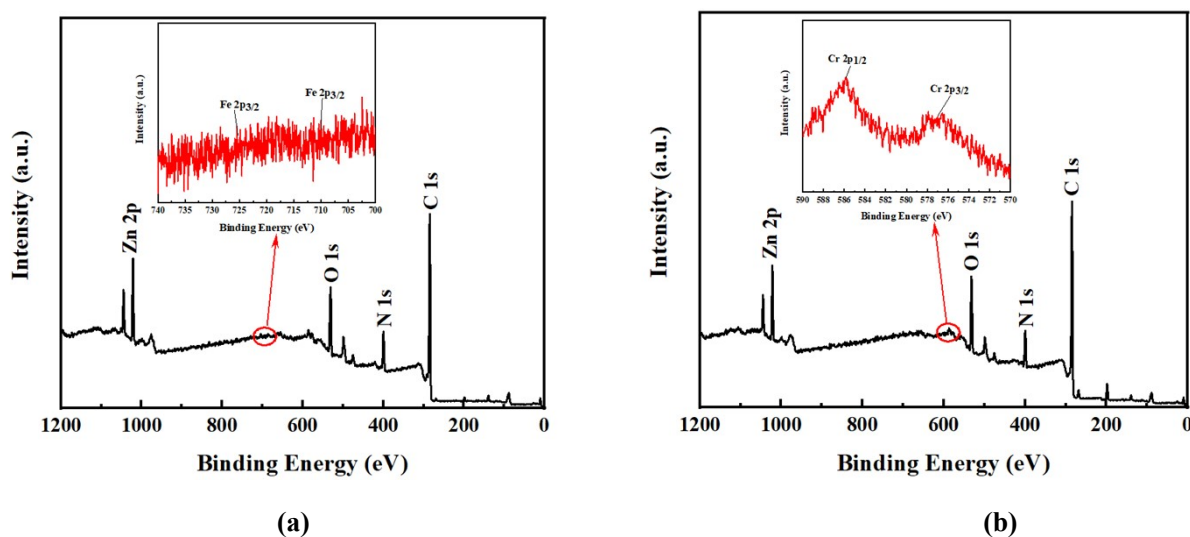

**Fig. S14.** The XPS patterns of (a) JXUST-7@ Fe<sup>3+</sup> and (b) JXUST-7@ Cr<sub>2</sub>O<sub>7</sub><sup>2-</sup>. (The sample of JXUST-7 was soaked in 5 mM Fe<sup>3+</sup> or Cr<sub>2</sub>O<sub>7</sub><sup>2-</sup> for 24 h, and then washed with ethanol).

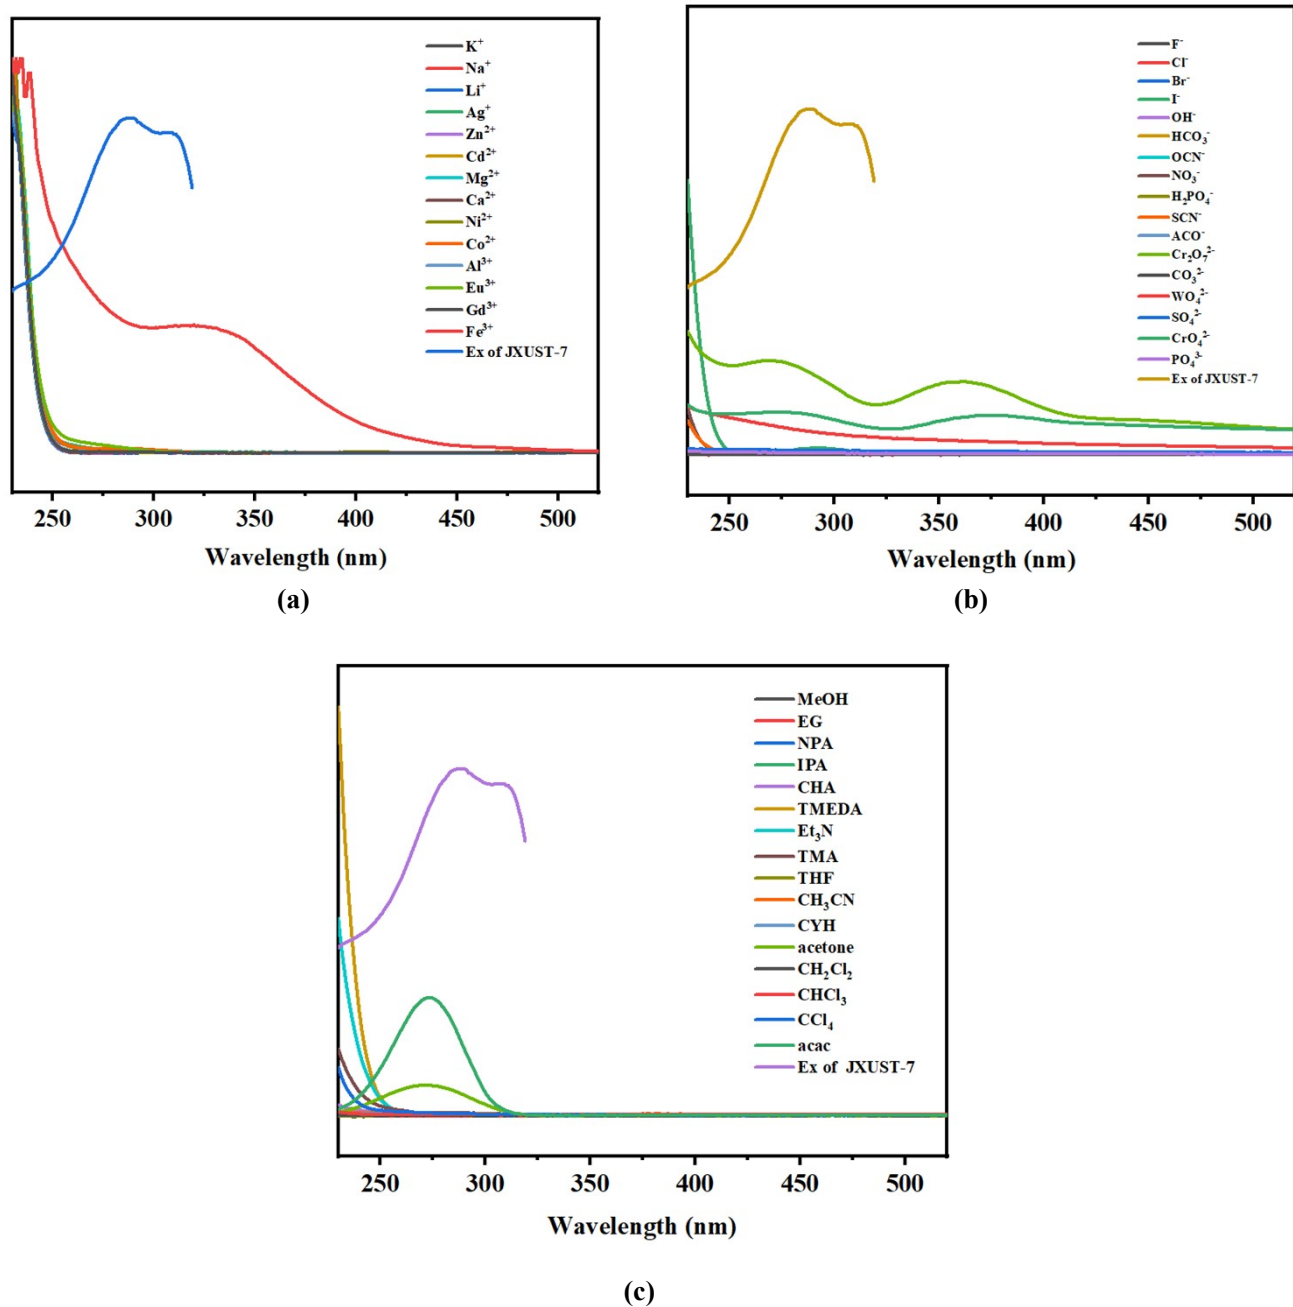

**Fig. S15.** The excitation spectrum of JXUST-7 and UV-Vis adsorption spectra of different (a)  $M(\text{NO}_3)_x$ , (b)  $\text{K}_y\text{A}$  and (c) small organic molecules.
